# Supplementary material for: Facile synthesis of 2,2′-dinitrosubstituted biaryls through Cu-catalyzed ligand-free decarboxylative homocoupling of ortho-nitrobenzoic acids
Source: Royal Society of Chemistry journal article supplement (doi:10.1039/c5ra07771k), 2015-01-01

## Supporting information

### Facile synthesis of 2,2'-dinitrosubstituted biaryls through Cu-catalyzed ligand-free decarboxylative homocoupling of *ortho*-nitrobenzoic acids

Zhengjiang Fu, Zhaojie Li, Qiheng Xiong, and Hu Cai\*

College of Chemistry, Nanchang University, Nanchang, Jiangxi 330031, China

*E-mail:* [caihu@ncu.edu.cn](mailto:caihu@ncu.edu.cn)

#### TABLE OF CONTENTS

| Contents                                                           | Page Number |
|--------------------------------------------------------------------|-------------|
| 1) General considerations and experimental procedures              | S2 – S6     |
| 2) References                                                      | S6          |
| 3) <sup>1</sup> H, <sup>13</sup> C and <sup>19</sup> F NMR spectra | S7 – S19    |

**General considerations.** The Reagents used for experiments were commercially available and were used as received unless otherwise noted. DMSO were distilled from CaH<sub>2</sub> under reduced pressure and stored under nitrogen. All Reactions were performed under nitrogen with the strict exclusion of dioxygen and moisture using Schlenk techniques. Column chromatography was performed on silica gel 300-400 mesh. The yields reported are the isolated yields and the average of two runs. <sup>1</sup>H, <sup>13</sup>C and <sup>19</sup>F NMR spectra were recorded at 400, 100 and 377 MHz with CDCl<sub>3</sub> as solvent respectively, however, considering the solubility of **2g** in CDCl<sub>3</sub>, its <sup>1</sup>H and <sup>13</sup>C NMR spectra were recorded at 400 and 100 MHz with (CD<sub>3</sub>)<sub>2</sub>SO as solvent. All coupling constants (*J* values) were reported in Hertz (Hz). Except **2g**, all compounds' HRMS were performed by Shanghai Mass Spectrometry Centre, Shanghai Institute of Organic Chemistry, Chinese Academic of Sciences. **2g**'s Elemental analyses were performed by Center of Analysis and Testing of Nanchang University.

**General procedure for Cu-catalyzed decarboxylative homocoupling of *ortho*-nitrobenzoic acids.**

An oven-dried Schlenk tube equipped with a stir bar was charged with aryl carboxylic acid (0.2 mmol), CuI (11.4 mg, 0.06 mmol, 30 mol%) and 4 Å molecular sieves (MS). The tube was fitted with a rubber septum, and then it was evacuated and refilled with nitrogen three times. Under nitrogen, DMSO (2 mL) was added via syringe. The rubber septum was replaced with a Teflon screwcap under nitrogen flow. With stirring, the reaction mixtures were heated at 140 °C for the indicated amount of time (unless otherwise specified), and then cooled down to room temperature. The resultant mixture was filtered through a short plug of silica gel and then concentrated in vacuo. The residue was then purified by flash chromatography on silica gel to provide the corresponding product.

**4,4'-dichloro-2,2'-dinitrobiphenyl (2a).** Procedure was followed using 4-chloro-2-nitrobenzoic acid (40.3 mg, 0.2 mmol), CuI (11.4 mg, 0.06 mmol, 30 mol%) and 4 Å molecular sieves (MS). The reaction mixtures were purified by flash column chromatography on silica gel (1% ether in hexane) to afford 22.6 mg (72%) of the product as a yellow solid. Exhibited spectral data in accordance with previous

report.<sup>1</sup> <sup>1</sup>H NMR (400 MHz, CDCl<sub>3</sub>): δ 8.23 (s, 2 H), 7.68 (d, *J* = 8.0 Hz, 2 H), 7.24 (d, *J* = 8.0 Hz, 2 H).

<sup>13</sup>C NMR (100 MHz, CDCl<sub>3</sub>): δ 147.4, 135.5, 133.7, 131.9, 131.5, 125.2.

**5,5'-dichloro-2,2'-dinitrobiphenyl (2b).** Procedure was followed using 5-chloro-2-nitrobenzoic acid (40.3 mg, 0.2 mmol), CuI (11.4 mg, 0.06 mmol, 30 mol%) and 4 Å molecular sieves (MS). The reaction mixtures were purified by flash column chromatography on silica gel (1% ether in hexane) to afford 17.9 mg (57%) of the product as a yellow solid. Exhibited spectral data in accordance with previous report.<sup>1</sup> <sup>1</sup>H NMR (400 MHz, CDCl<sub>3</sub>): δ 8.15 (d, *J* = 8.8 Hz, 2 H), 7.52 (dd, *J* = 8.8, 1.5 Hz, 2 H), 7.23 (d, *J* = 1.8 Hz, 2 H). <sup>13</sup>C NMR (100 MHz, CDCl<sub>3</sub>): δ 145.1, 140.2, 134.8, 130.6, 129.6, 126.4.

**4,4'-difluoro-2,2'-dinitrobiphenyl (2c).** Procedure was followed using 4-fluoro-2-nitrobenzoic acid (37.0 mg, 0.2 mmol), CuI (11.4 mg, 0.06 mmol, 30 mol%) and 4 Å molecular sieves (MS). The reaction mixtures were purified by flash column chromatography on silica gel (1% ether in hexane) to afford 10.1 mg (36%) of the product as a yellow solid. Exhibited spectral data in accordance with previous report.<sup>2</sup> <sup>1</sup>H NMR (400 MHz, CDCl<sub>3</sub>): δ 7.96 (dd, *J* = 8.3, 2.6 Hz, 2 H), 7.46 - 7.41(m, 2 H), 7.31 - 7.26 (m, 2 H). <sup>13</sup>C NMR (100 MHz, CDCl<sub>3</sub>): δ 163.2, 160.7, 132.6 (d, *J* = 8.1 Hz), 129.1 (d, *J* = 4.1 Hz), 121.9 (d, *J* = 21.2 Hz), 112.8 (d, *J* = 27.3 Hz). <sup>19</sup>F NMR (377 MHz, CDCl<sub>3</sub>): δ -108.8 - -108.9 (m).

**5,5'-difluoro-2,2'-dinitrobiphenyl (2d).** Procedure was followed using 5-fluoro-2-nitrobenzoic acid (37.0 mg, 0.2 mmol), CuI (11.4 mg, 0.06 mmol, 30 mol%) and 4 Å molecular sieves (MS). The reaction mixtures were purified by flash column chromatography on silica gel (1% ether in hexane) to afford 17.5 mg (63%) of the product as a yellow solid. Exhibited spectral data in accordance with previous report.<sup>2</sup> <sup>1</sup>H NMR (400 MHz, CDCl<sub>3</sub>): δ 8.33 - 8.29 (m, 2 H), 7.25 - 7.31 (m, 2 H), 7.01 - 6.99 (m, 2 H). <sup>13</sup>C NMR (100 MHz, CDCl<sub>3</sub>): δ 166.0, 163.5, 136.3, 127.9 (d, *J* = 10.1 Hz), 117.8 (d, *J* = 24.3 Hz), 116.4 (d, *J* = 23.2 Hz). <sup>19</sup>F NMR (377 MHz, CDCl<sub>3</sub>): δ -105.0 - -105.1 (m). HRMS (MALDI-TOF) *m/z*: [M]<sup>+</sup> Calcd for C<sub>12</sub>H<sub>6</sub>F<sub>2</sub>N<sub>2</sub>O<sub>4</sub> 280.0296; Found 280.0301.

**4,4',5,5'-tetrafluoro-2,2'-dinitrobiphenyl (2e).** Procedure was followed using 4,5-difluoro-2-nitrobenzoic acid (40.6 mg, 0.2 mmol), CuI (11.4 mg, 0.06 mmol, 30 mol%) and 4 Å molecular sieves (MS). The reaction mixtures were purified by flash column chromatography on silica gel (1.5% ether in hexane) to afford 10.0 mg (32%) of the product as a yellow solid. Exhibited spectral data in accordance with previous report.<sup>2</sup> <sup>1</sup>H NMR (400 MHz, CDCl<sub>3</sub>): δ 8.21 - 8.17 (m, 2 H), 7.17 - 7.13 (m, 2 H). <sup>13</sup>C NMR (100 MHz, CDCl<sub>3</sub>): δ 154.4 (d, *J*=13.1 Hz), 151.8 - 150.8 (m), 150.9 (d, *J* = 13.1 Hz), 148.3 (d, *J* = 13.1 Hz), 119.6 (d, *J* = 20.2 Hz), 115.8 - 115.6 (m), 110.0. <sup>19</sup>F NMR (377 MHz, CDCl<sub>3</sub>): δ -125.4 - -125.5 (m), -131.2 - -131.3 (m). HRMS (MALDI-TOF) *m/z*: [M]<sup>+</sup> Calcd for C<sub>12</sub>H<sub>4</sub>F<sub>4</sub>N<sub>2</sub>O<sub>4</sub> 316.0107; Found 316.0102.

**2,2'-dinitro-4,4'-bis(trifluoromethyl)biphenyl (2f).** Procedure was followed using 2-nitro-4-(trifluoromethyl)benzoic acid (47.0 mg, 0.2 mmol), CuI (11.4 mg, 0.06 mmol, 30 mol%) and 4 Å molecular sieves (MS). The reaction mixtures were purified by flash column chromatography on silica gel (2% ether in hexane) to afford 23.7 mg (62%) of the product as a yellow solid. Exhibited spectral data in accordance with previous report.<sup>3</sup> <sup>1</sup>H NMR (400 MHz, CDCl<sub>3</sub>): δ 8.56 (s, 2 H), 8.00 (d, *J* = 8.0 Hz, 2 H), 7.47 (d, *J* = 8.0 Hz, 2 H). <sup>13</sup>C NMR (100 MHz, CDCl<sub>3</sub>): δ 136.6, 132.4, 131.5 - 131.4 (m), 130.4 - 130.2 (m), 123.9, 122.5 - 122.4 (m), 121.2. <sup>19</sup>F NMR (377 MHz, CDCl<sub>3</sub>): δ -63.01 (s).

**2,2'-dinitro-4,4'-bis(methylsulfonyl)biphenyl (2g).** Procedure was followed using 4-methylsulfonyl-2-nitrobenzoic acid (49.0 mg, 0.2 mmol), CuI (11.4 mg, 0.06 mmol, 30 mol%) and 4 Å molecular sieves (MS). The reaction mixtures were purified by flash column chromatography on silica gel (50% ether in hexane) to afford 16.6 mg (42%) of the product as a yellow solid. <sup>1</sup>H NMR (400 MHz, (CD<sub>3</sub>)<sub>2</sub>SO): δ 8.76 (d, *J* = 1.7 Hz, 2 H), 8.42 (dd, *J* = 1.6, 8.1 Hz, 2 H), 7.88 (d, *J* = 8.0 Hz, 2 H), 3.47 (s, 6 H). <sup>13</sup>C NMR (100 MHz, (CD<sub>3</sub>)<sub>2</sub>SO): δ 147.0, 142.7, 137.4, 133.1, 132.7, 124.0, 43.4. Anal. Calcd. for C<sub>14</sub>H<sub>12</sub>N<sub>2</sub>O<sub>8</sub>S<sub>2</sub>: C, 42.00; H, 3.02. Found: C, 42.11; H, 3.08.

**2,2'-dinitrobiphenyl (2h).** Procedure was followed using 2-nitrobenzoic acid (33.4 mg, 0.2 mmol), CuI (11.4 mg, 0.06 mmol, 30 mol%) and 4 Å molecular sieves (MS). The reaction mixtures were purified by flash column chromatography on silica gel (3% ether in hexane) to afford 13.0 mg (53%) of the product as a yellow solid. Exhibited spectral data in accordance with previous report.<sup>4</sup> <sup>1</sup>H NMR (400 MHz, CDCl<sub>3</sub>): δ 8.23 (d, *J* = 8.0 Hz, 2 H), 7.69 (t, *J* = 8.0 Hz, 2 H), 7.60 (t, *J* = 8.0 Hz, 2 H), 7.30 (d, *J* = 8.0 Hz, 2 H). <sup>13</sup>C NMR (100 MHz, CDCl<sub>3</sub>): δ 134.2, 133.4, 130.9, 129.1, 124.8.

**4,4'-dimethyl-2,2'-dinitrobiphenyl (2i).** Procedure was followed using 4-methyl-2-nitrobenzoic acid (36.2 mg, 0.2 mmol), CuI (11.4 mg, 0.06 mmol, 30 mol%) and 4 Å molecular sieves (MS). The reaction mixtures were purified by flash column chromatography on silica gel (5% ether in hexane) to afford 15.9 mg (58%) of the product as a yellow solid. Exhibited spectral data in accordance with previous report.<sup>4</sup> Exhibited spectral data in accordance with previous report.<sup>3</sup> <sup>1</sup>H NMR (400 MHz, CDCl<sub>3</sub>): δ 8.00 (s, 2 H), 7.46 (d, *J* = 8.0 Hz, 2 H), 7.15 (d, *J* = 8.0 Hz, 2 H), 2.51 (s, 6 H). <sup>13</sup>C NMR (100 MHz, CDCl<sub>3</sub>): δ 139.6, 134.0, 130.9, 125.1, 21.0.

**4,4'-dimethoxy-2,2'-dinitrobiphenyl (2k).** Procedure was followed using 4-methoxy-2-nitrobenzoic acid (39.4 mg, 0.2 mmol), CuI (11.4 mg, 0.06 mmol, 30 mol%) and 4 Å molecular sieves (MS). The reaction mixtures were purified by flash column chromatography on silica gel (8% ether in hexane) to afford 10.2 mg (34%) of the product as a yellow solid. Exhibited spectral data in accordance with previous report.<sup>4</sup> Exhibited spectral data in accordance with previous report.<sup>4</sup> <sup>1</sup>H NMR (400 MHz, CDCl<sub>3</sub>): δ 7.68 (s, 2 H), 7.21 - 7.16 (m, 4 H), 3.93 (s, 6 H). <sup>13</sup>C NMR (100 MHz, CDCl<sub>3</sub>): δ 159.6, 148.2, 132.2, 125.7, 119.7, 109.5, 56.0.

**5,5'-dimethoxy-2,2'-dinitrobiphenyl (2l).** Procedure was followed using 5-methoxy-2-nitrobenzoic acid (39.4 mg, 0.2 mmol), CuI (11.4 mg, 0.06 mmol, 30 mol%) and 4 Å molecular sieves (MS). The reaction mixtures were purified by flash column chromatography on silica gel (25% ether in hexane) to

afford 19.7 mg (65%) of the product as a yellow solid. Exhibited spectral data in accordance with previous report.<sup>5</sup> Exhibited spectral data in accordance with previous report.<sup>5</sup> <sup>1</sup>H NMR (400 MHz, CDCl<sub>3</sub>):  $\delta$  8.28 (d,  $J$  = 8.0 Hz, 2 H), 7.02-6.99 (m, 2 H), 6.71 (d,  $J$  = 2.6 Hz, 2 H), 3.90 (s, 6 H). <sup>13</sup>C NMR (100 MHz, CDCl<sub>3</sub>):  $\delta$  163.3, 140.1, 137.4, 127.5, 115.7, 113.3, 56.1.

## References

1. S. Tasler, J. Mies and M. Lang, *Adv. Synth. Catal.*, 2007, 349, 2286-2300.
2. M. Protiva, J. Jílek, M. Rajšner, J. Pomykáček, M. Ryska, J. Holubek, E. Svátek and J. Metyšová, *Collect. Czech. Chem. Commun.*, 1986, 51, 698-722.
3. H.-R. Bjørsvik, R. R. González and L. Liguori, *J. Org. Chem.*, 2004, 69, 7720-7727.
4. J. Cornella, H. Lahlali and I. Larrosa, *Chem. Commun.*, 2010, 46, 8276-8278.
5. Y. Zhang, H. Wei and W. Zhang, *Tetrahedron*, 2009, 65, 1281-1286.

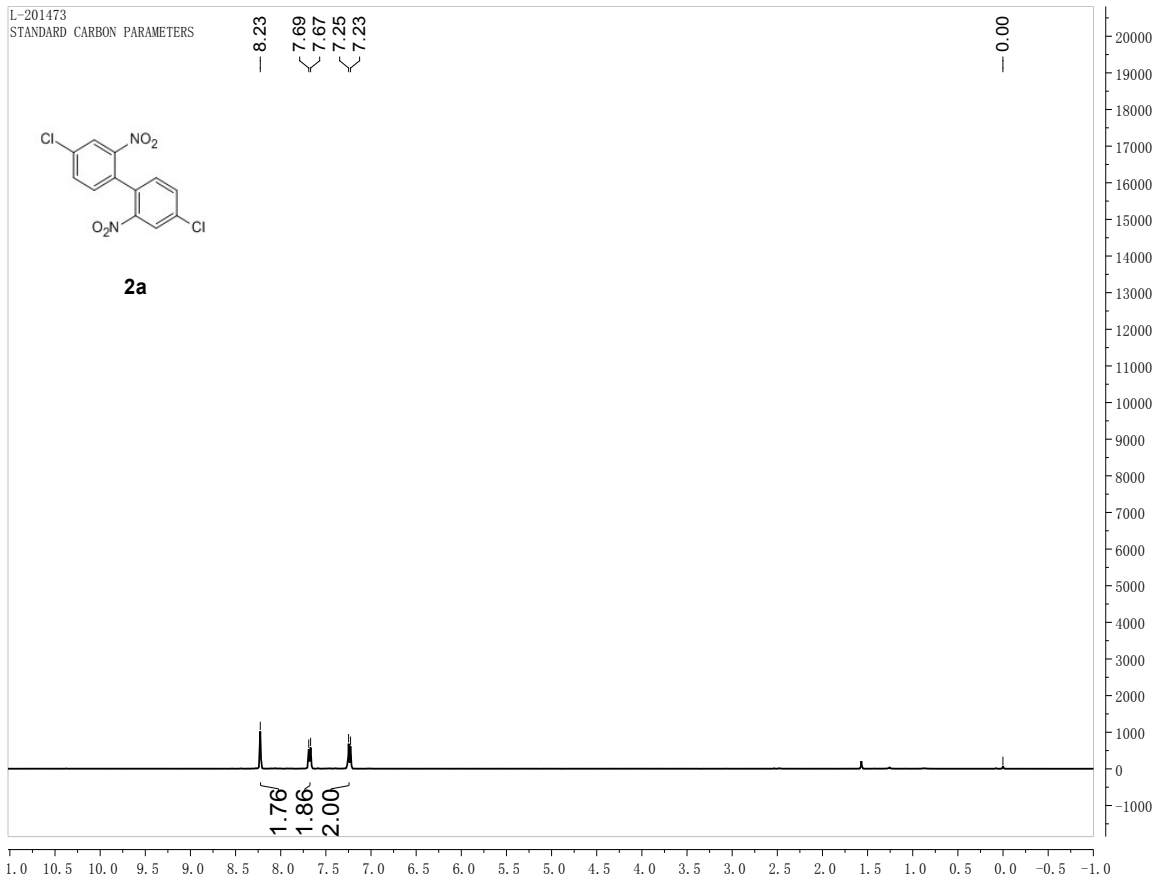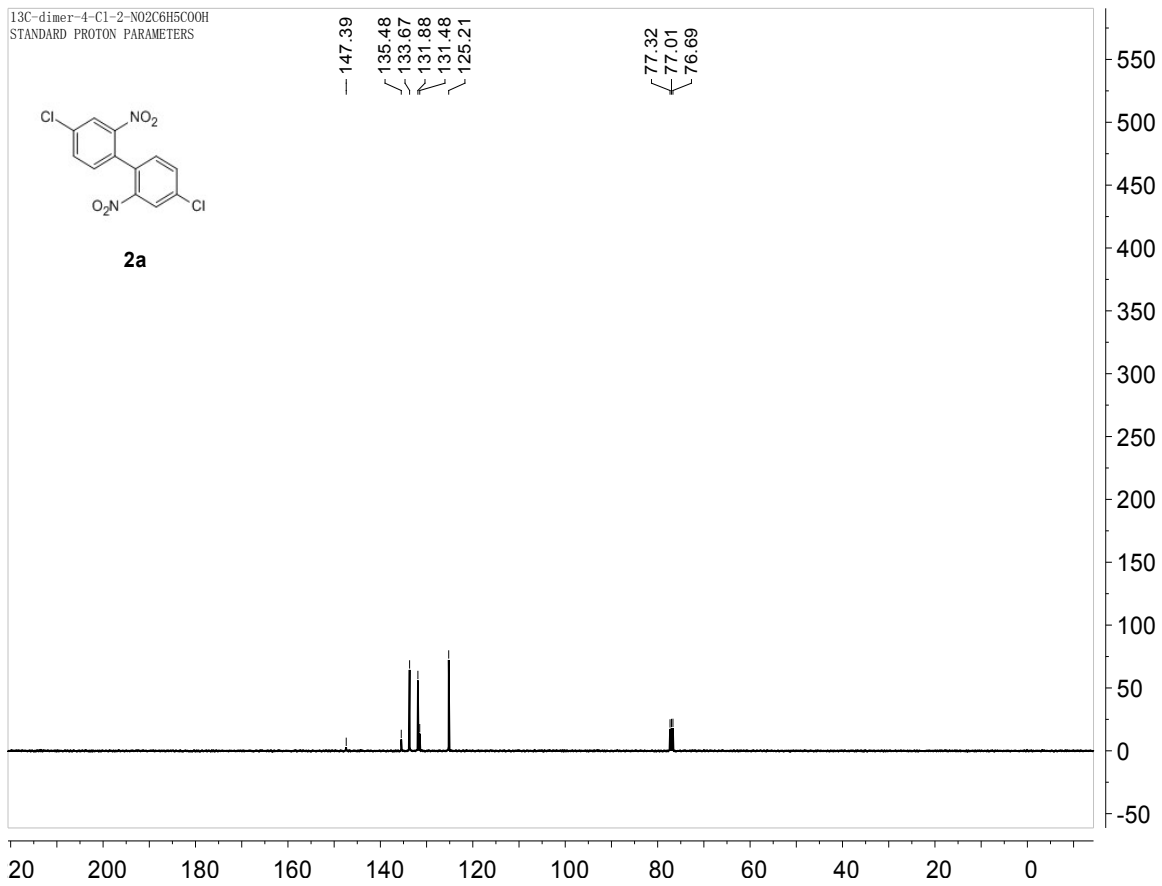

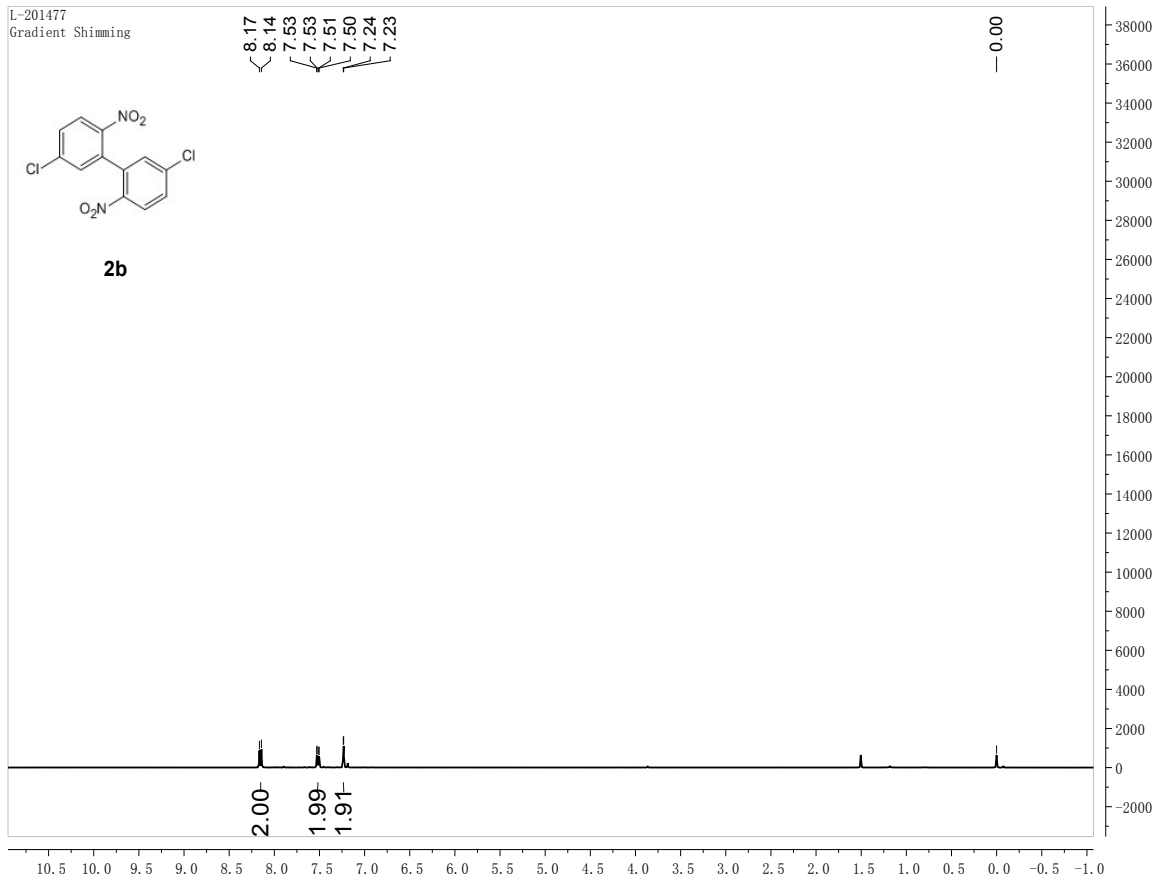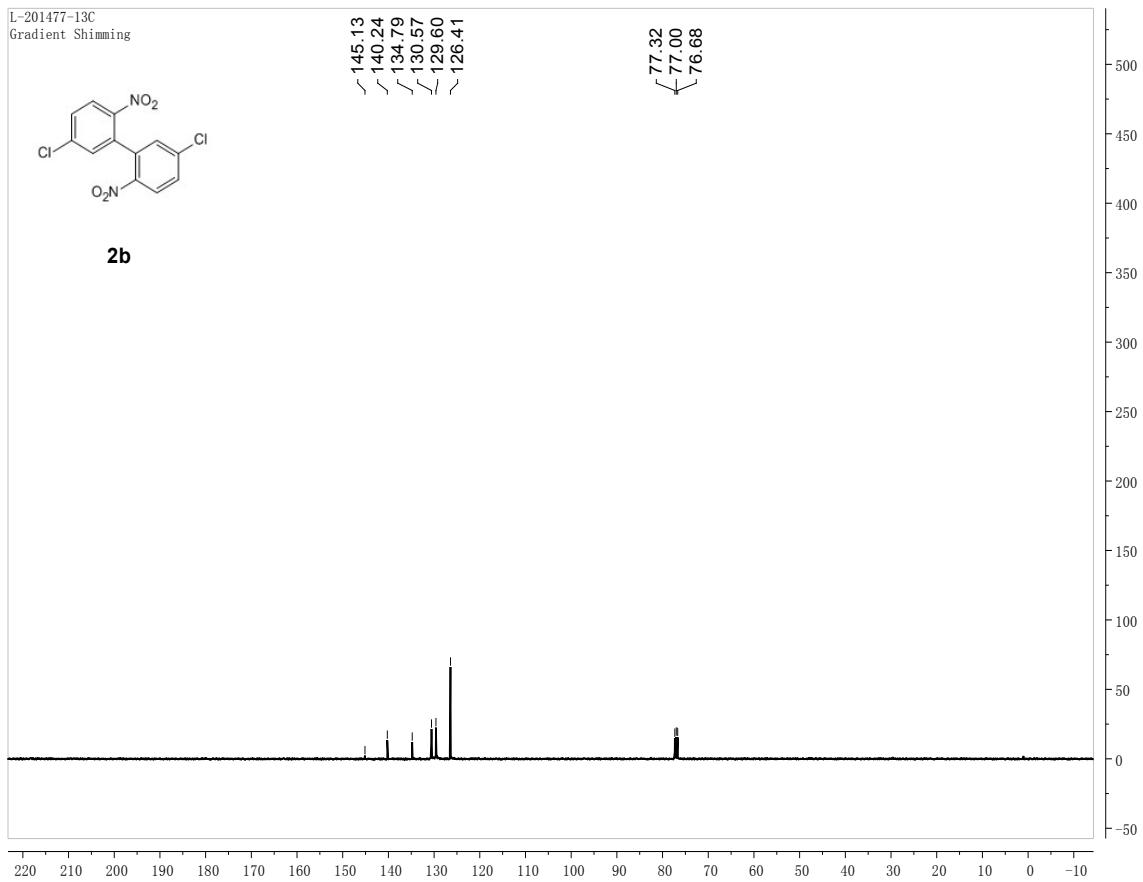



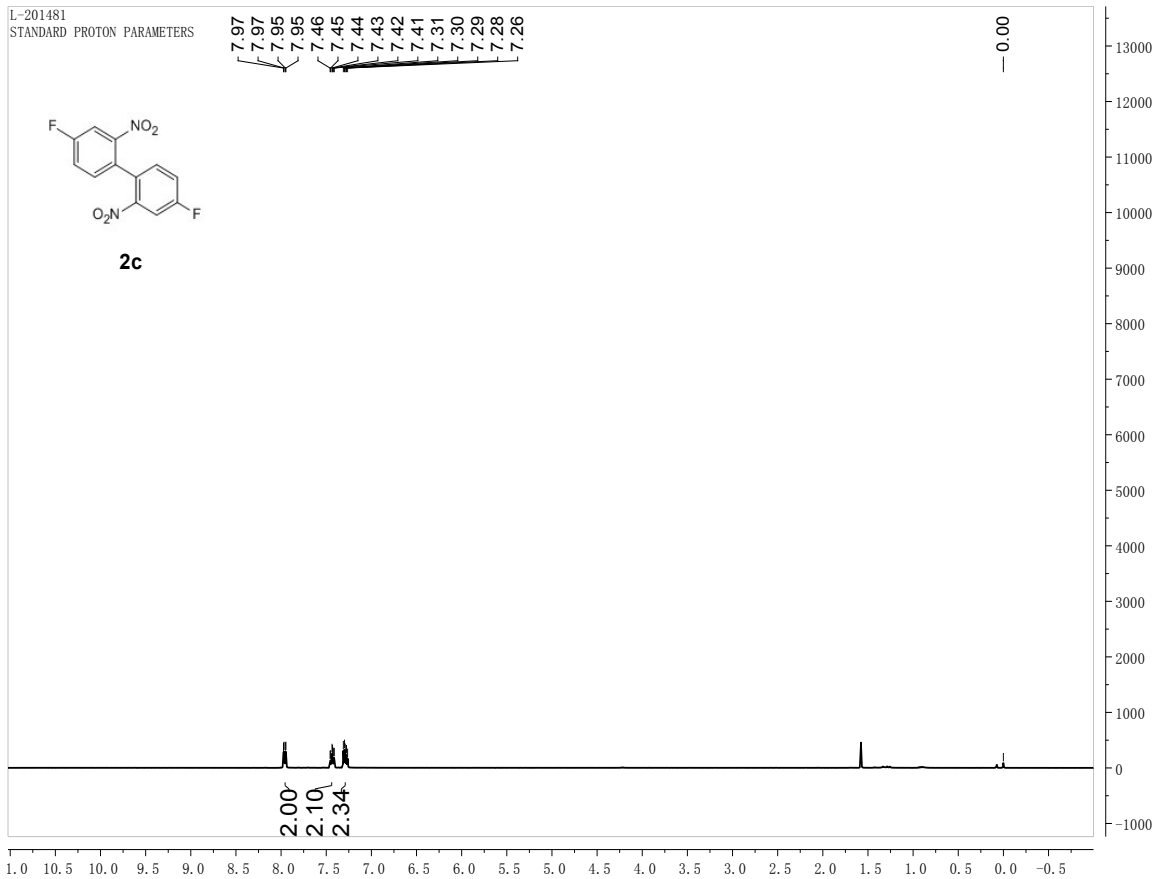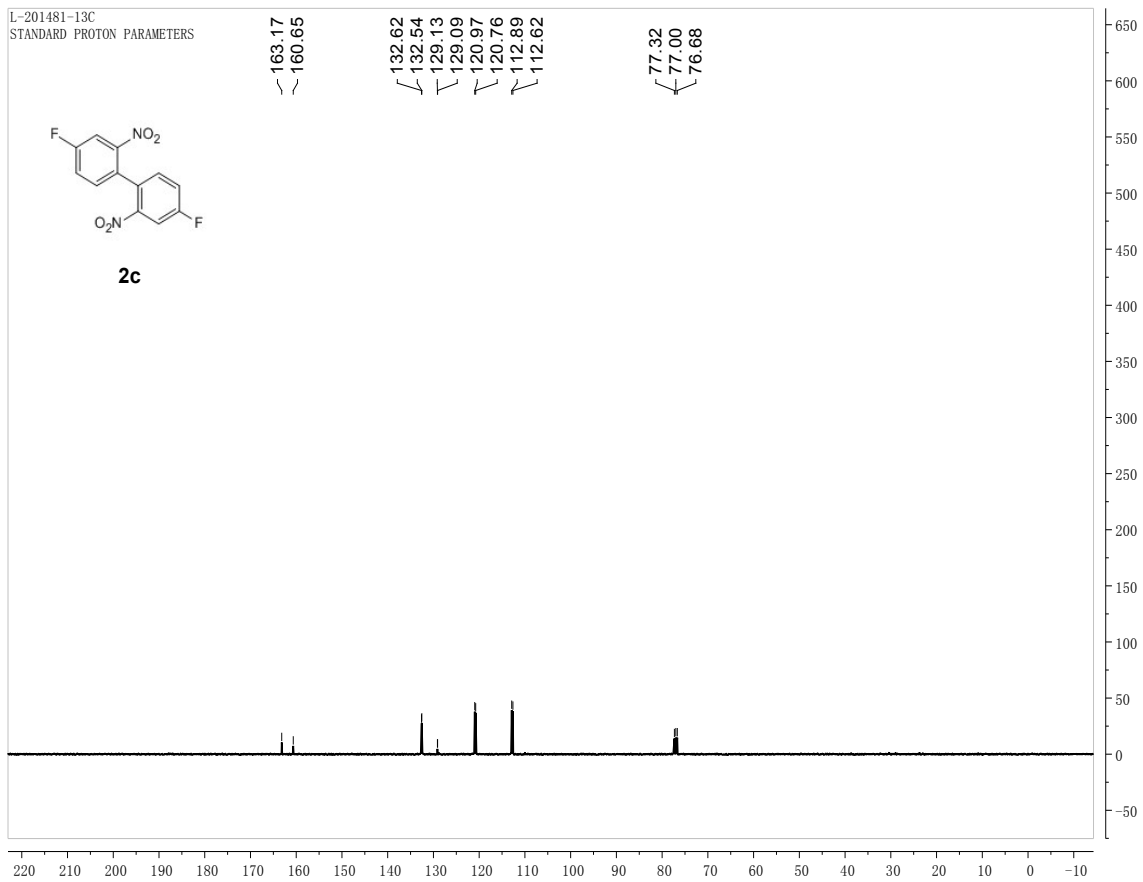

L-201481-19F  
STANDARD PROTON PARAMETERS

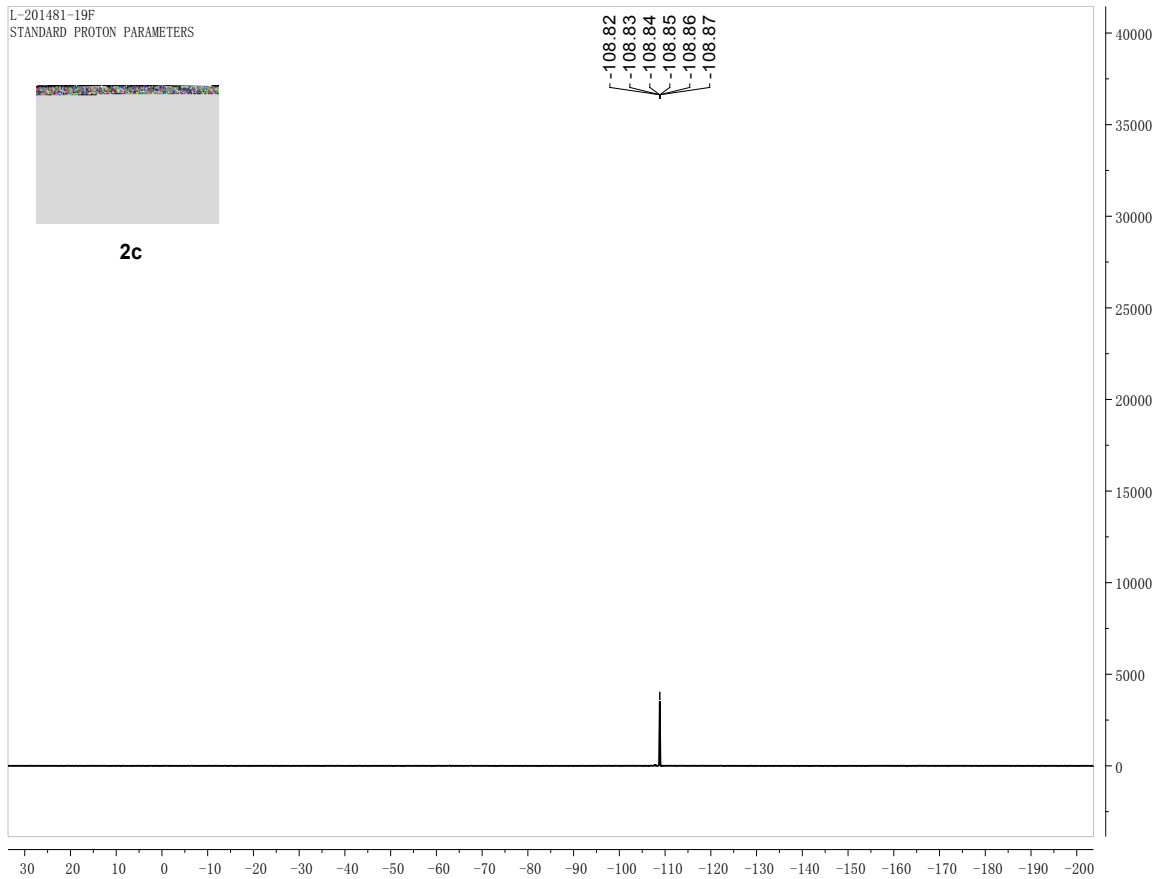

L-201476  
STANDARD PROTON PARAMETERS

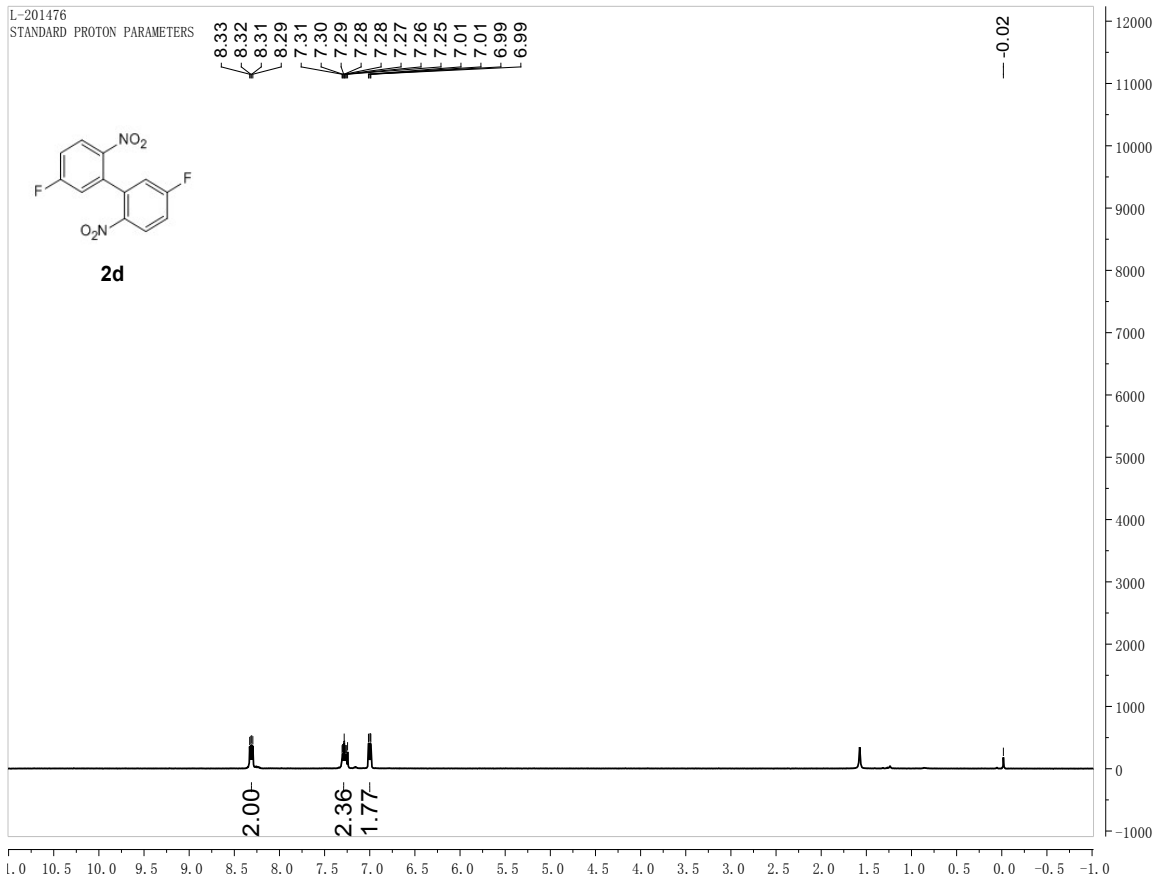

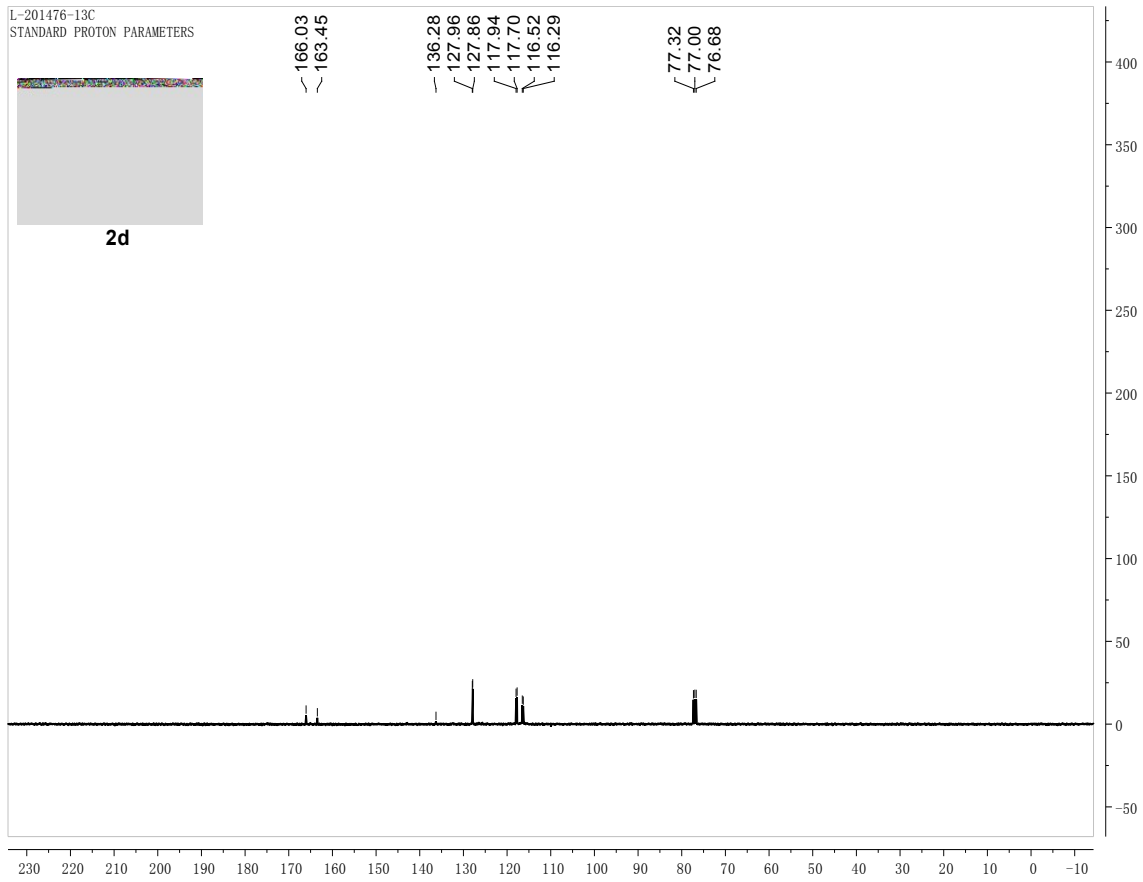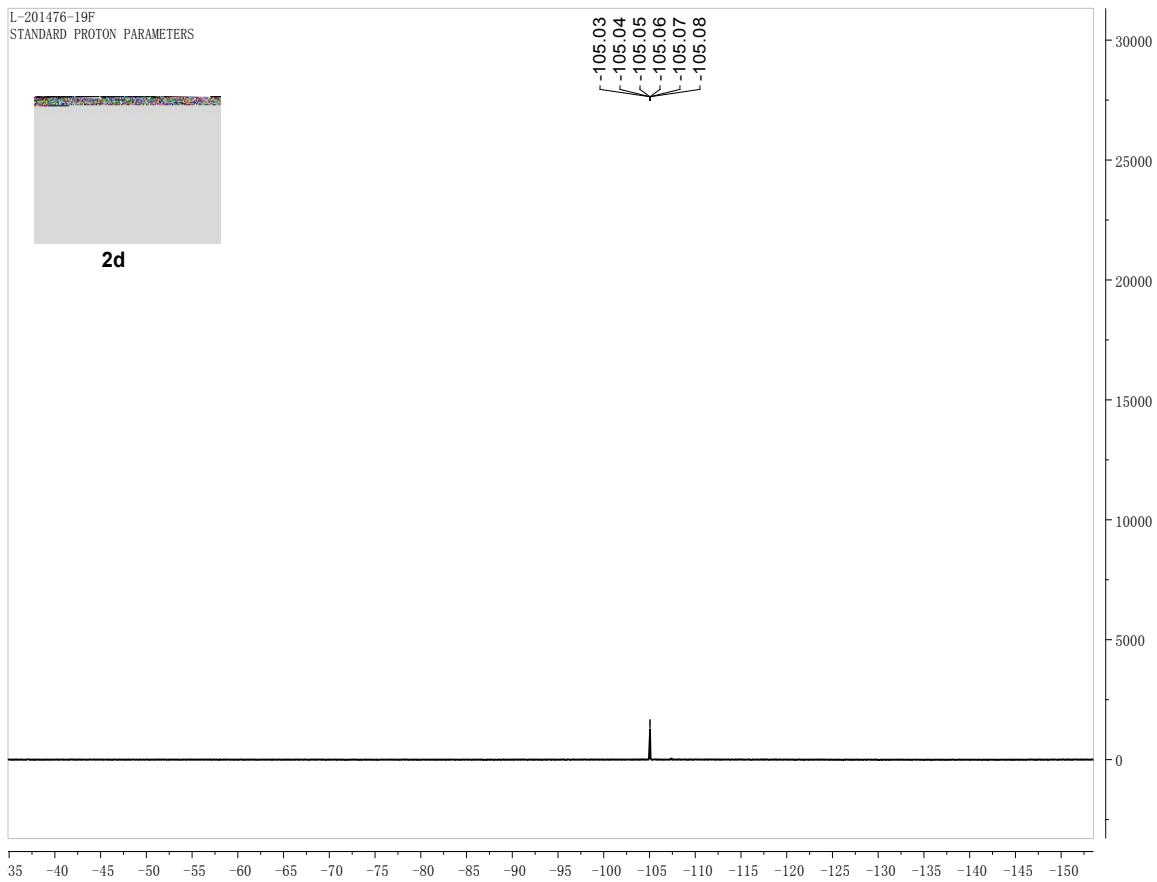

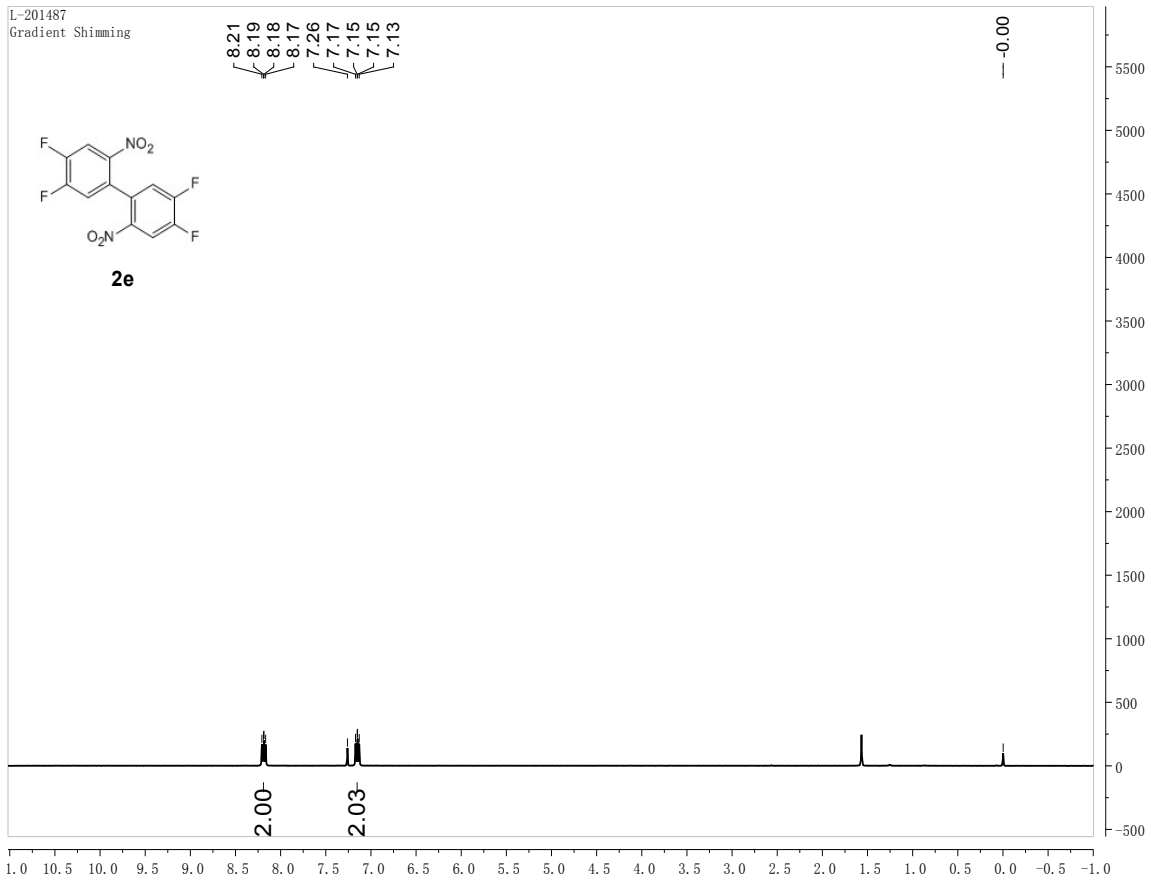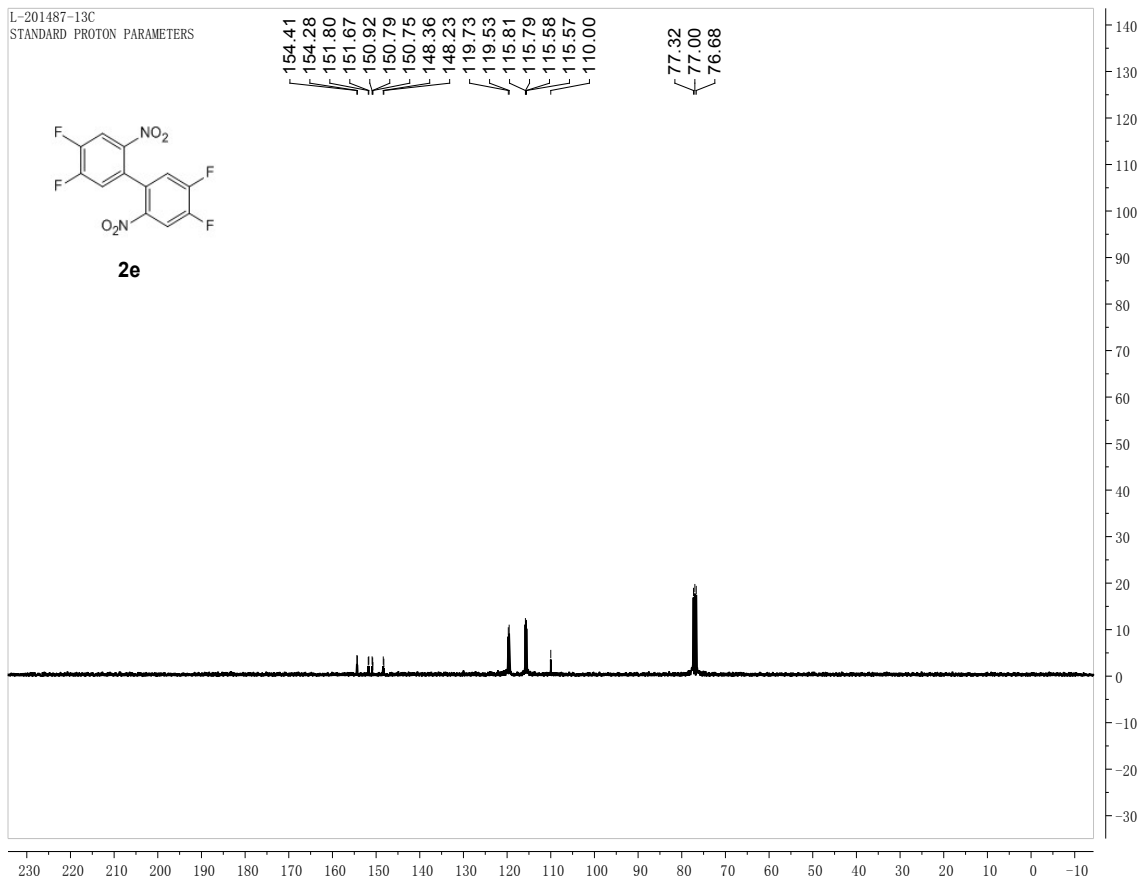

L-201487-19F  
STANDARD PROTON PARAMETERS

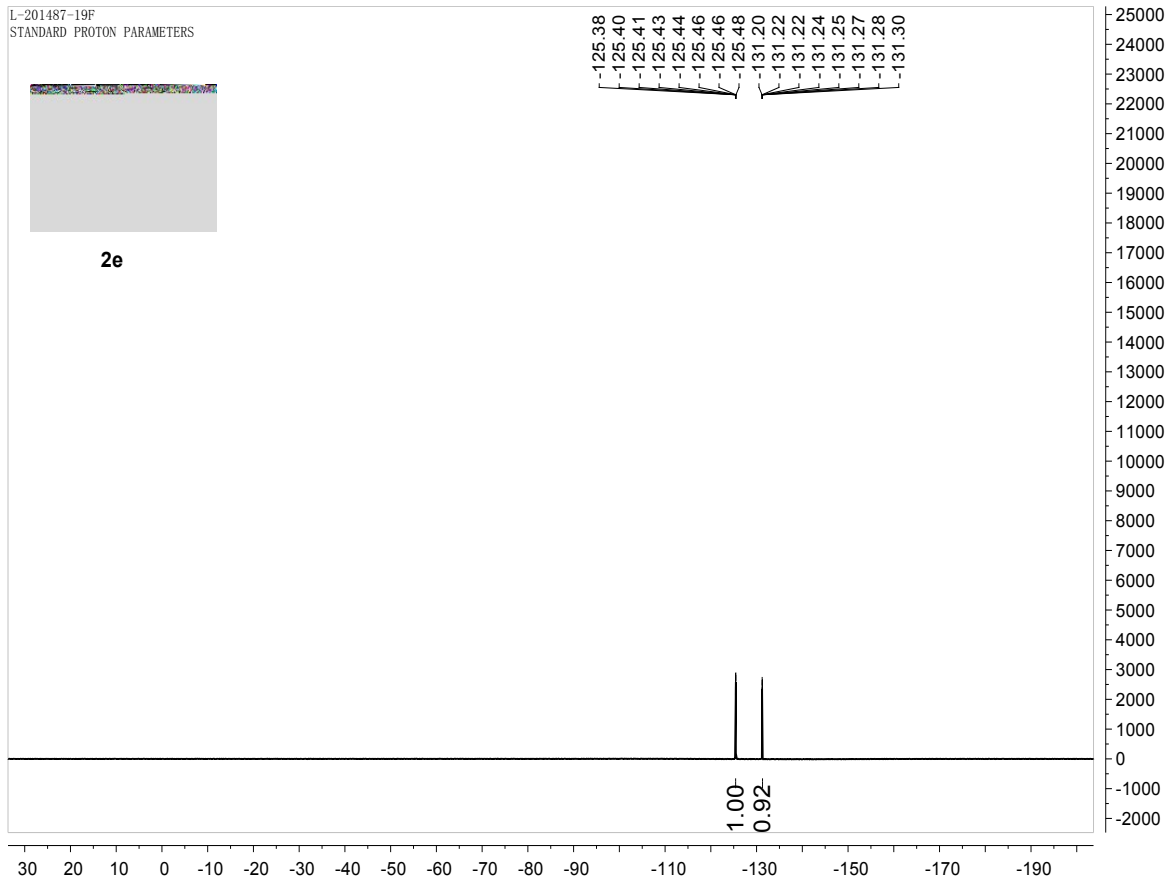

L-201474  
STANDARD CARBON PARAMETERS

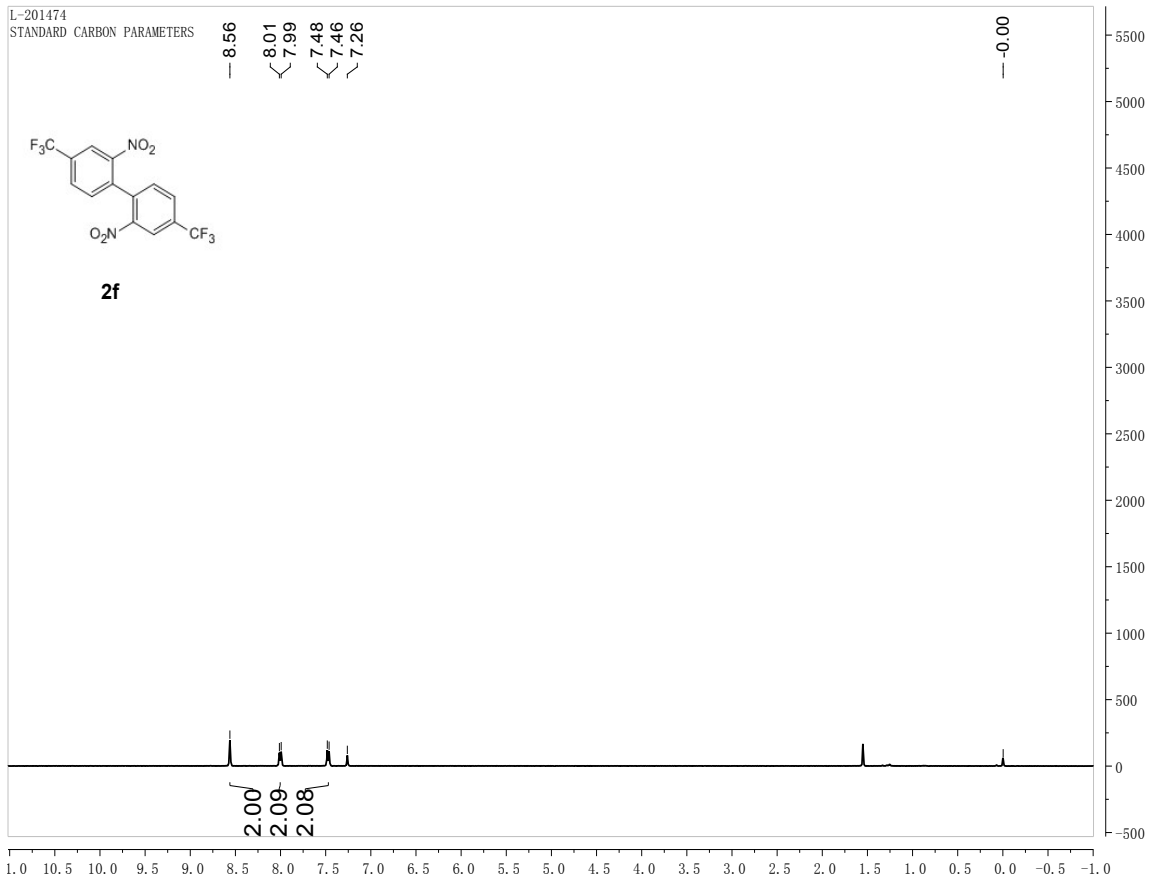

L-201474-13C  
STANDARD CARBON PARAMETERS

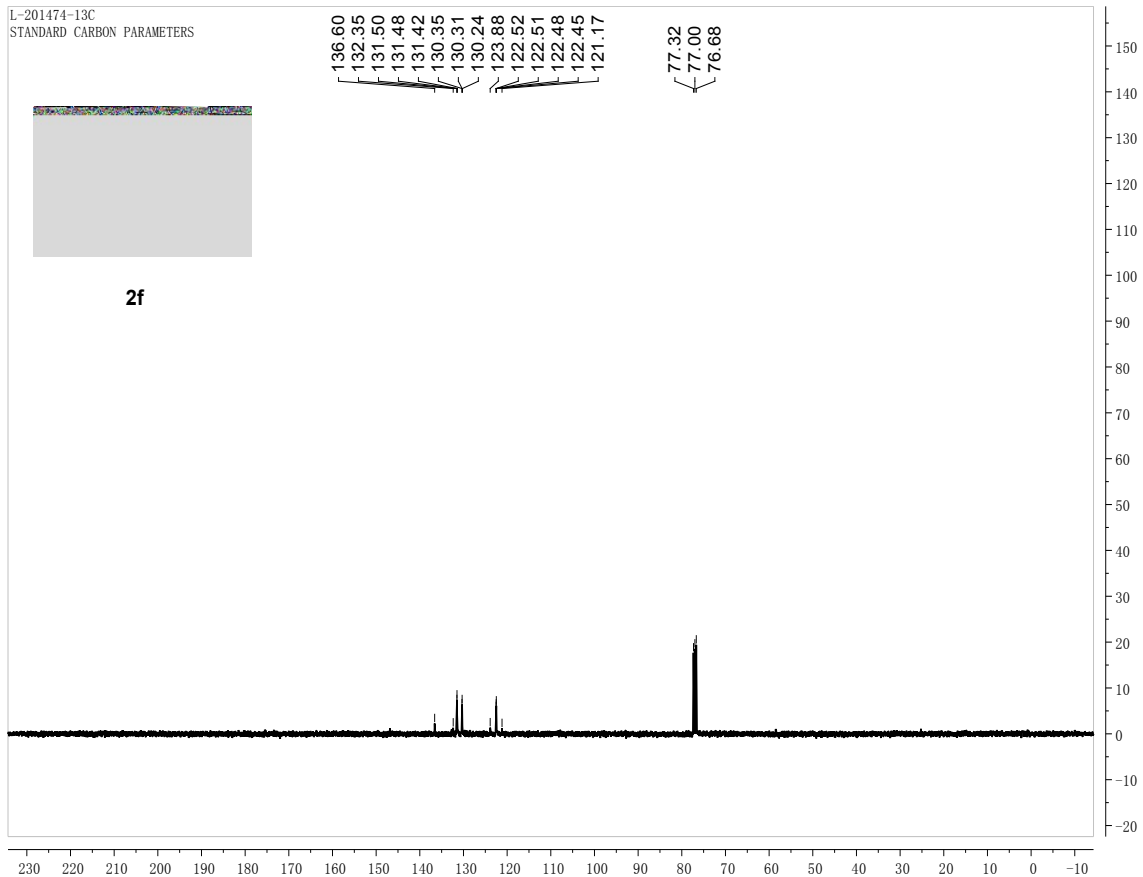

L-201474-19F  
STANDARD PROTON PARAMETERS

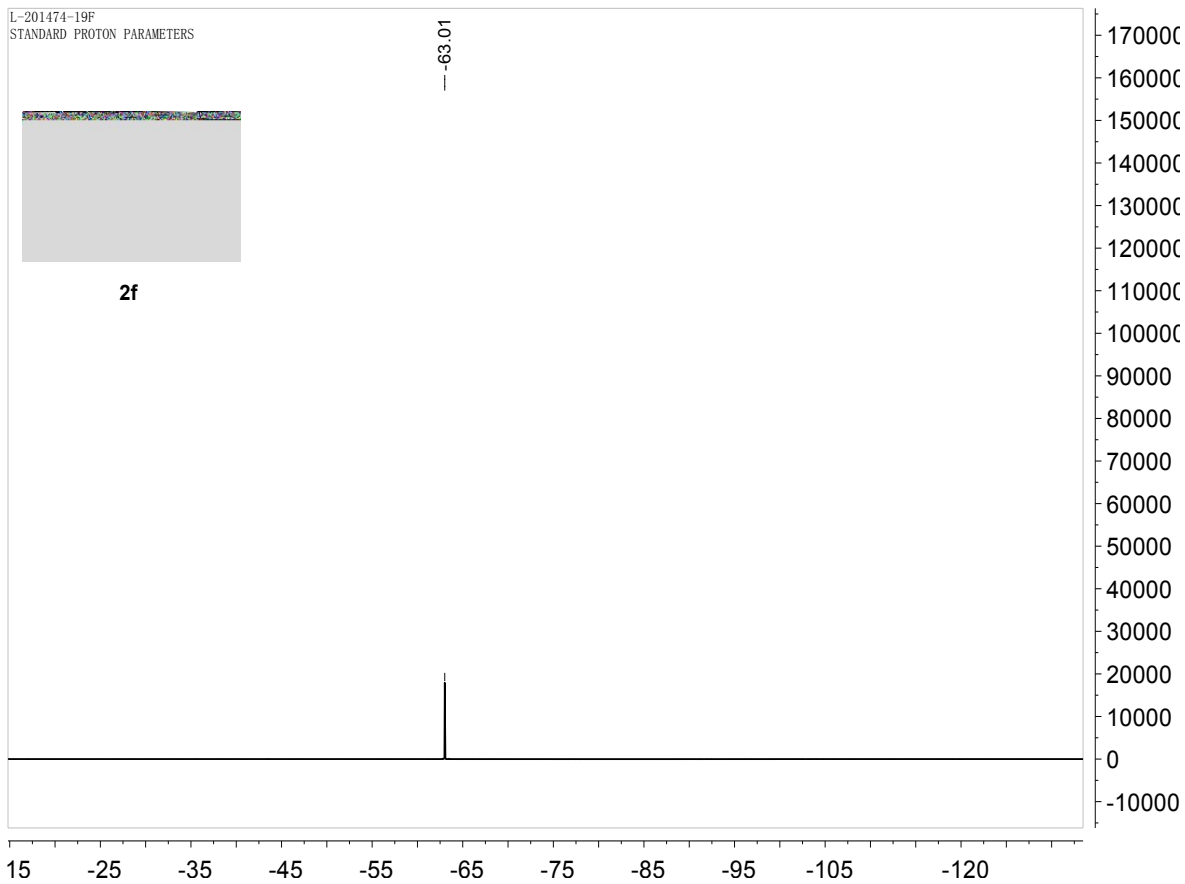

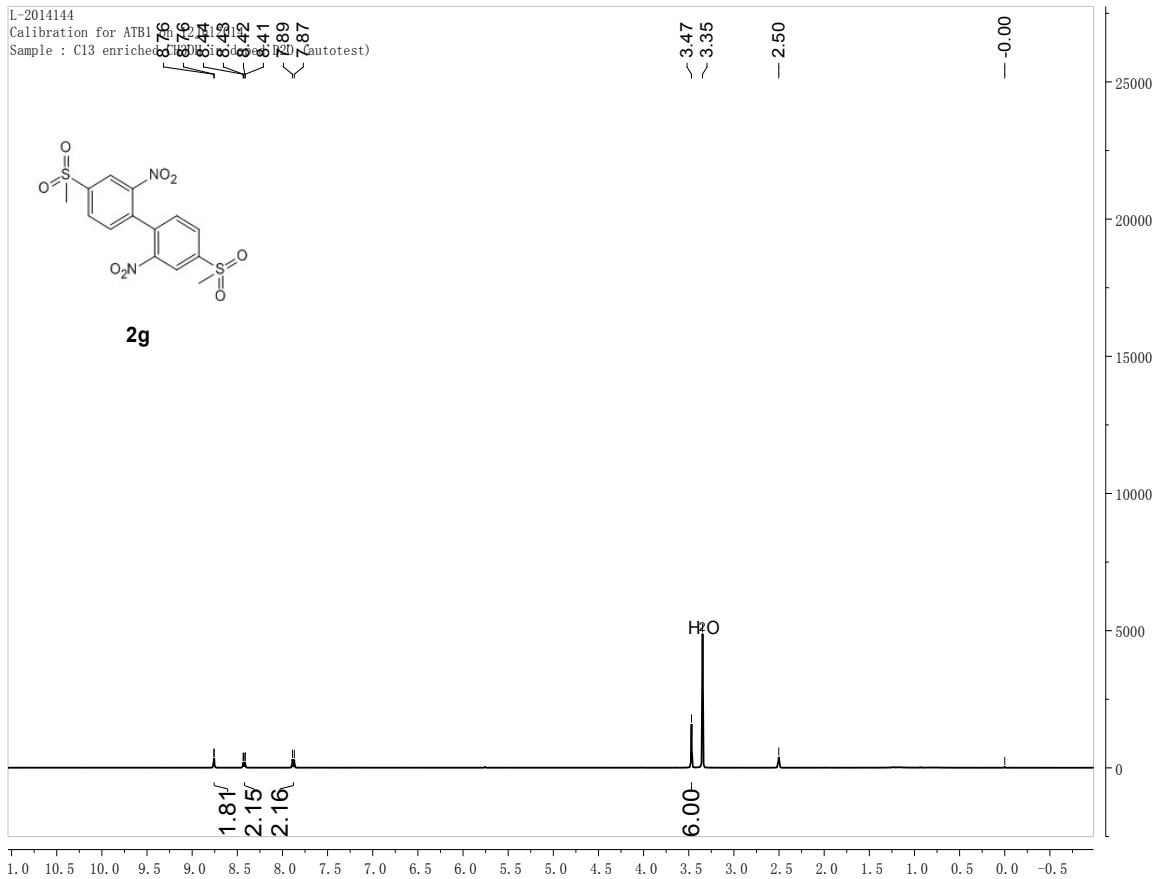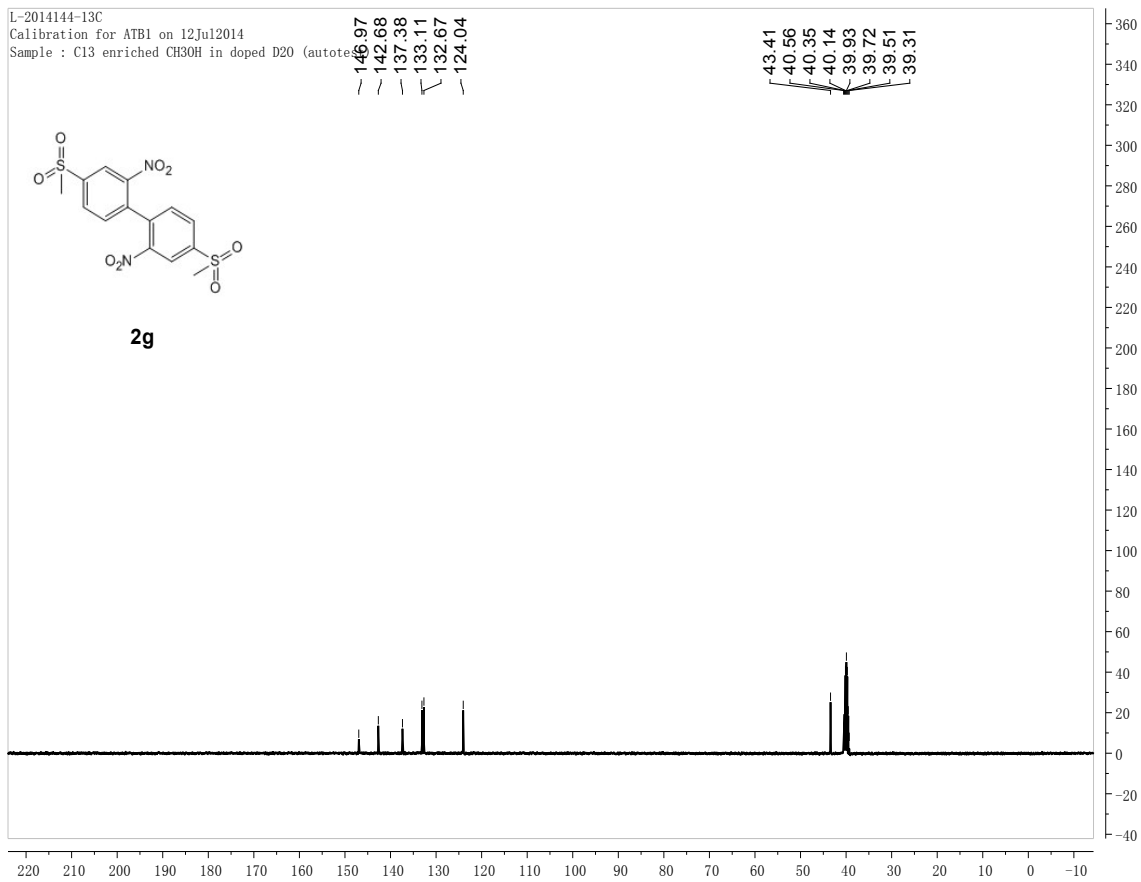

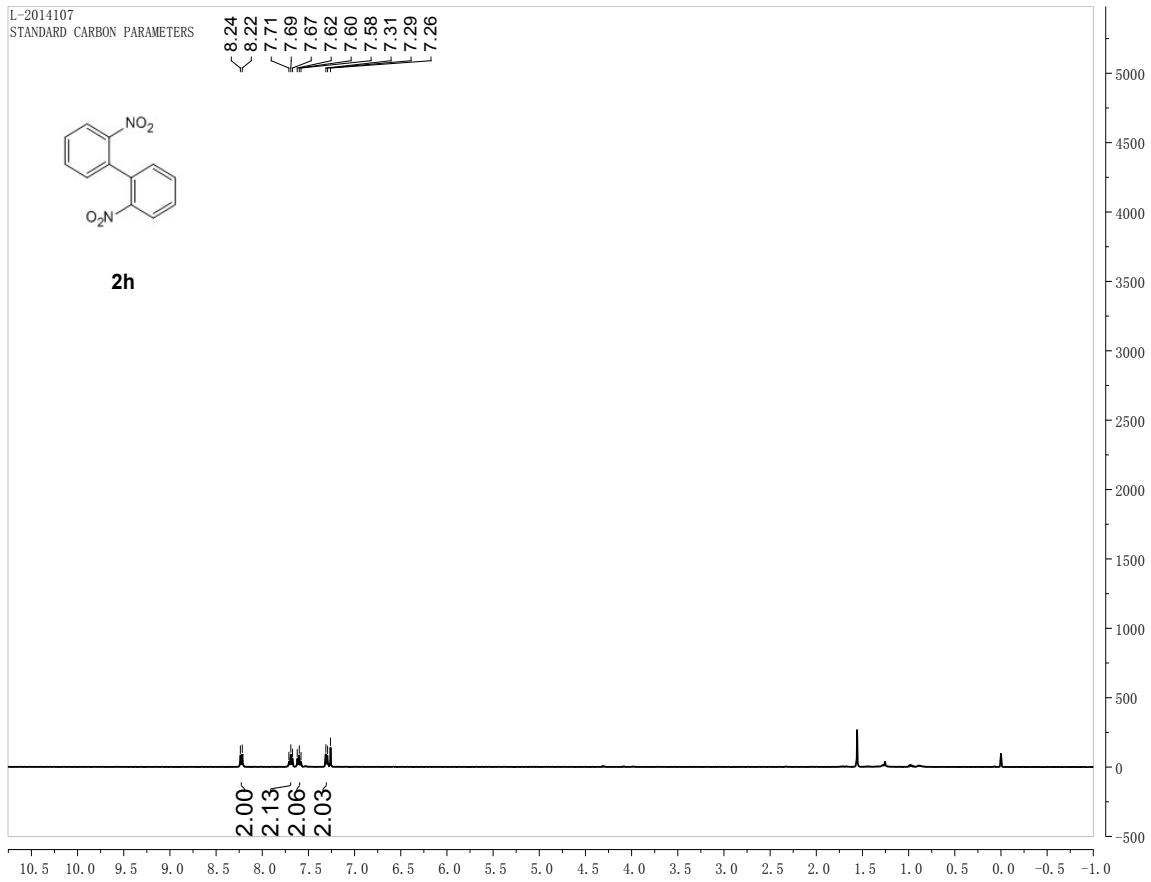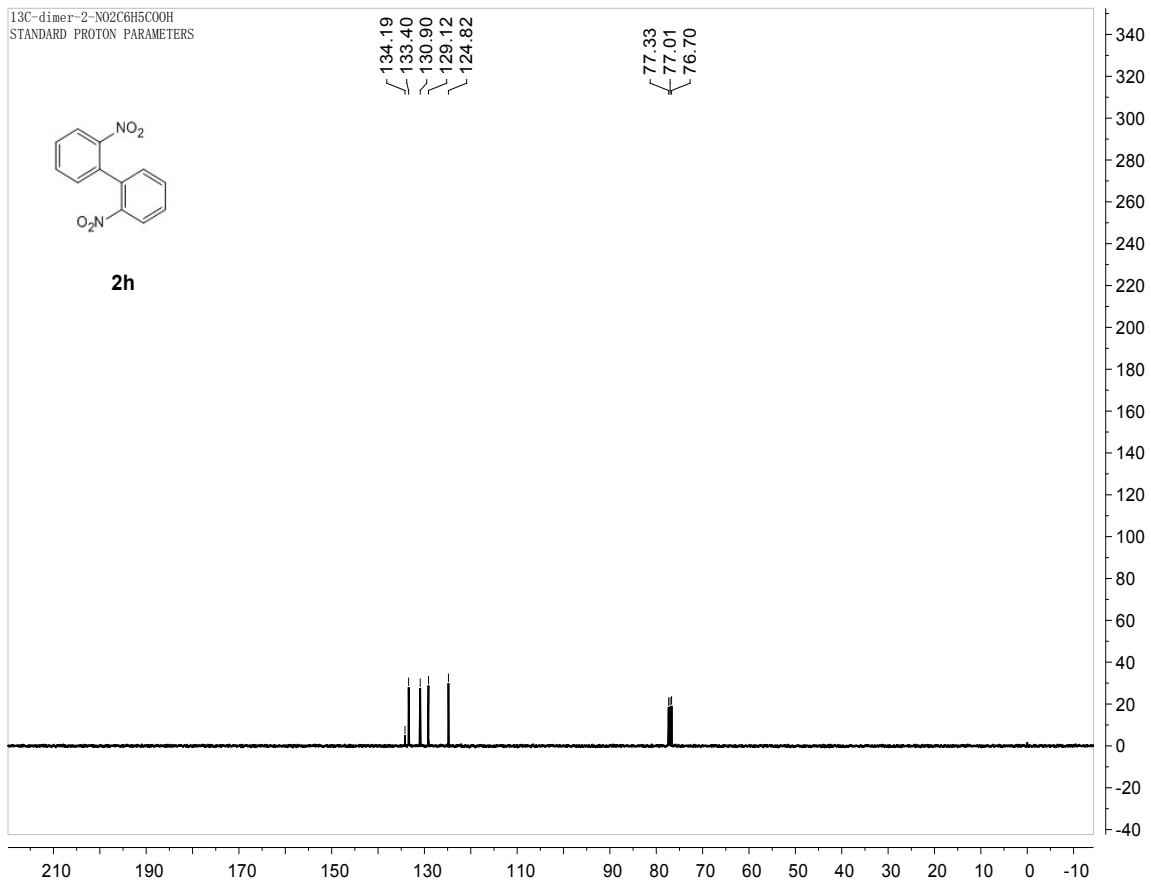



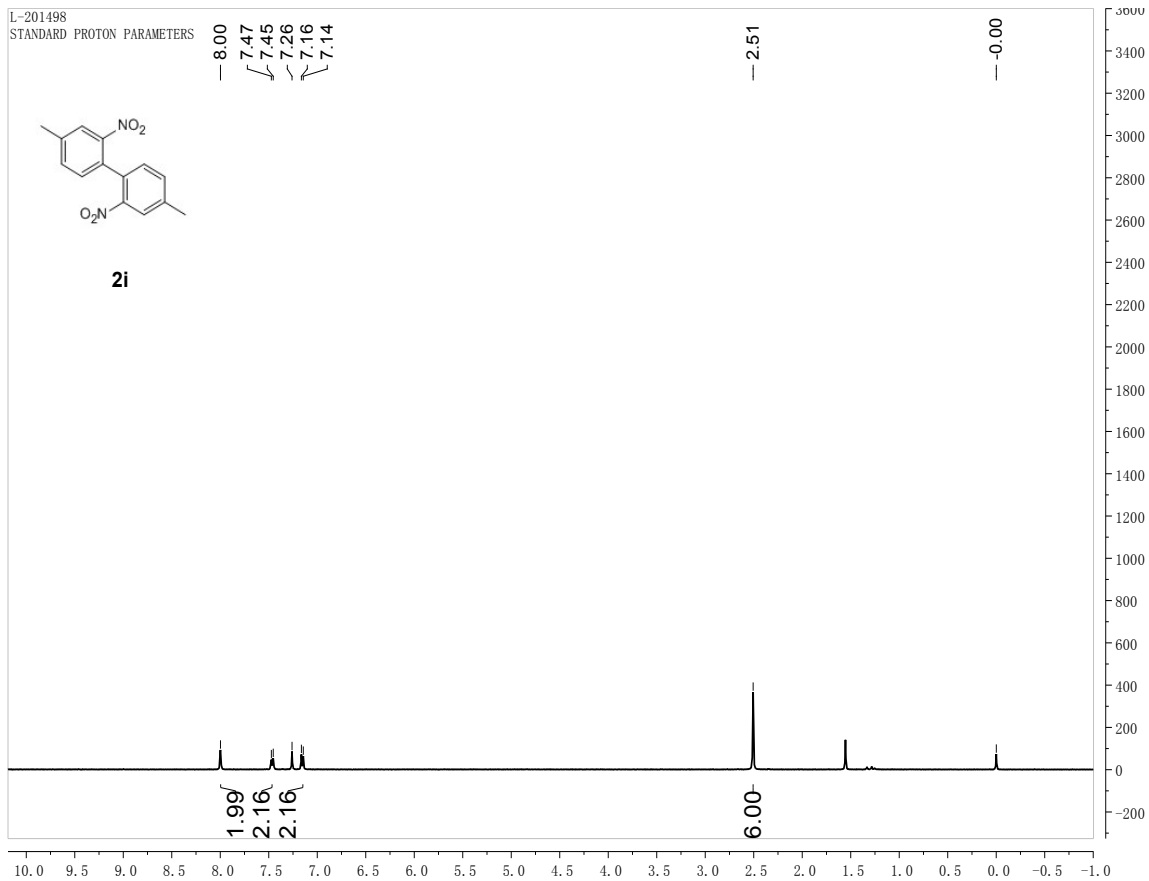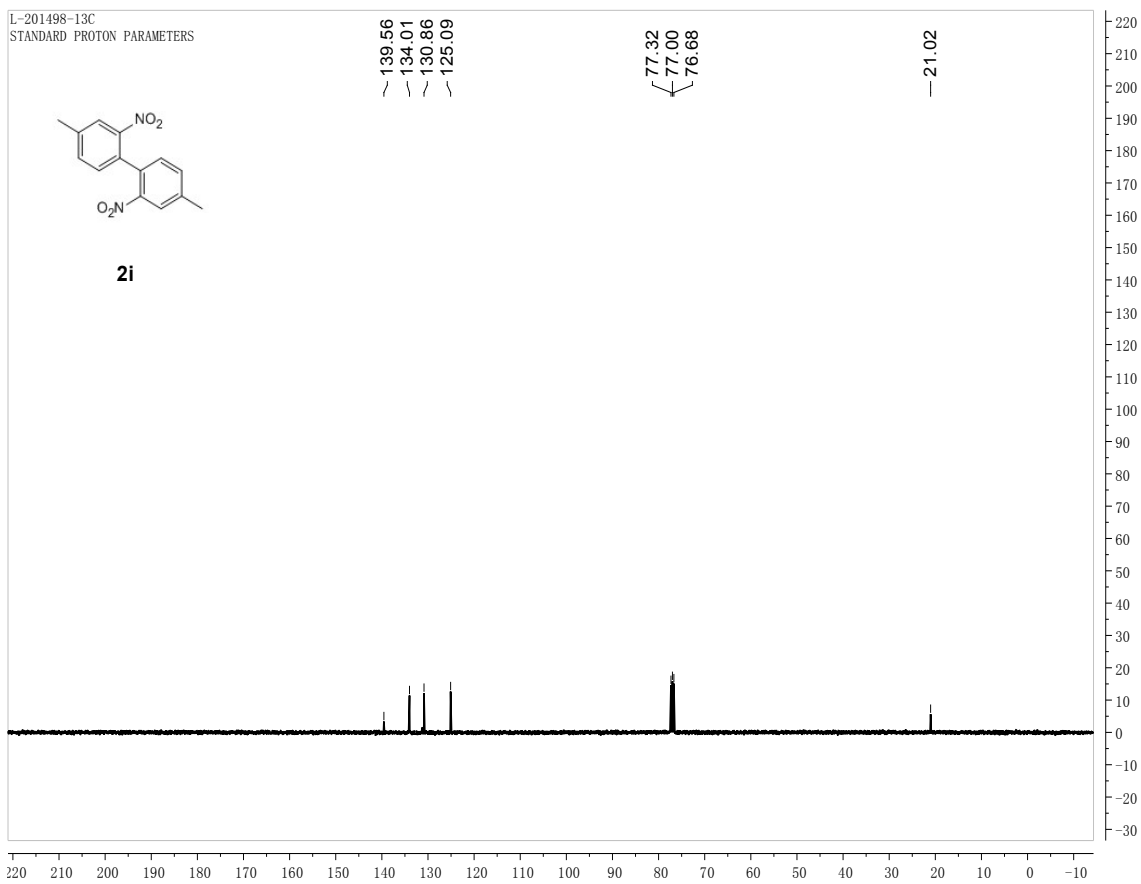

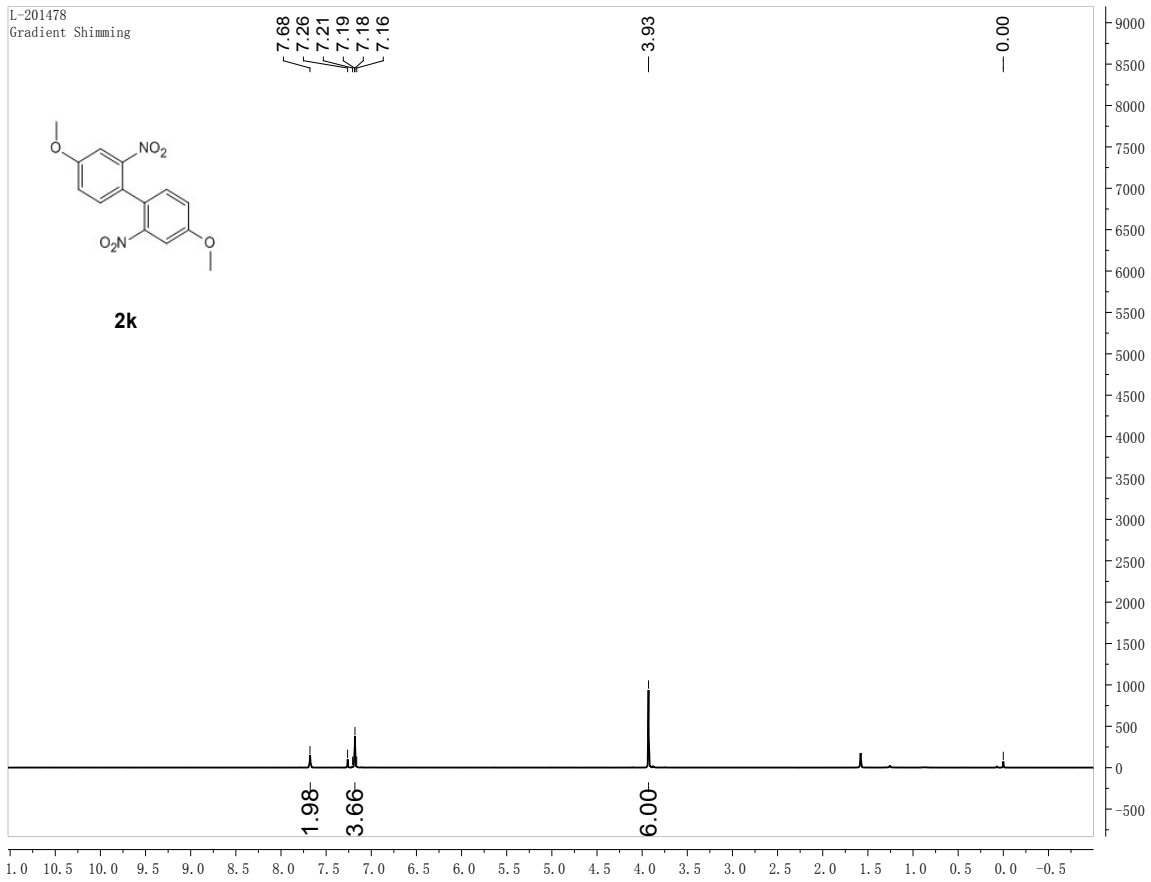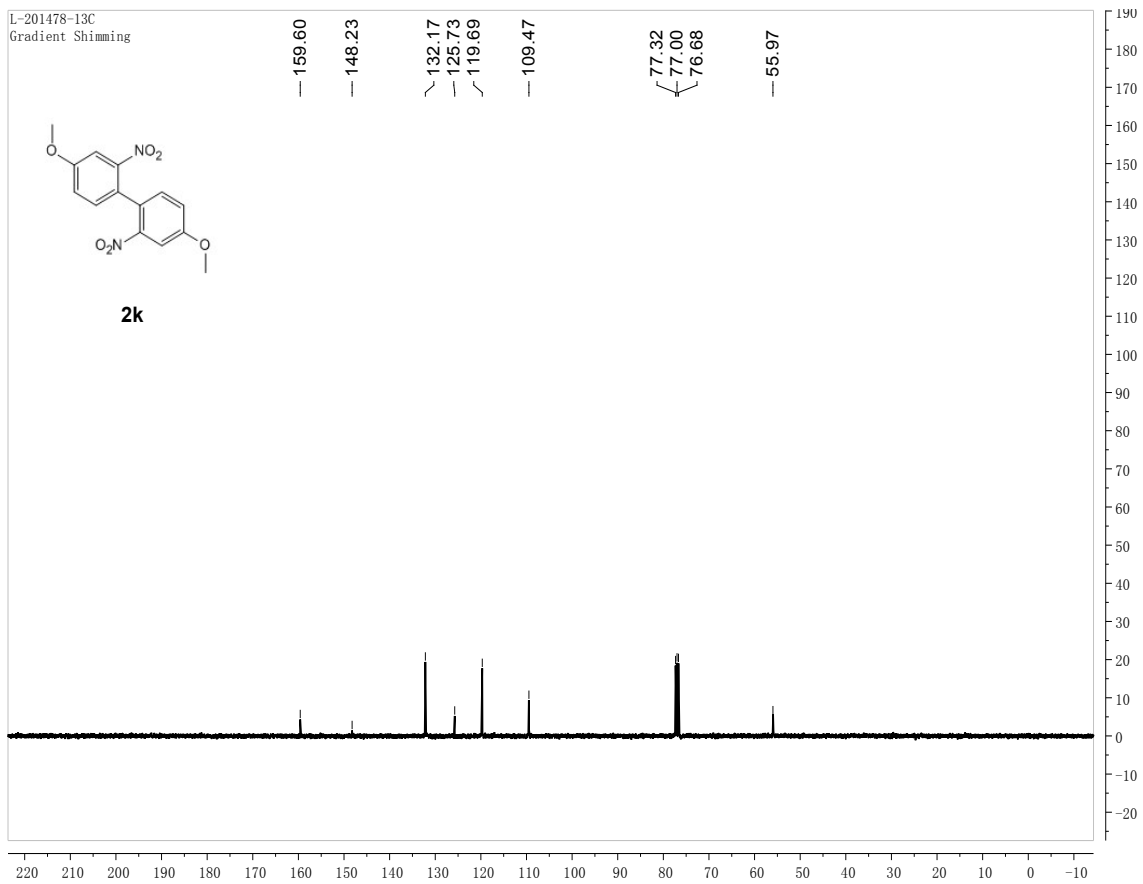

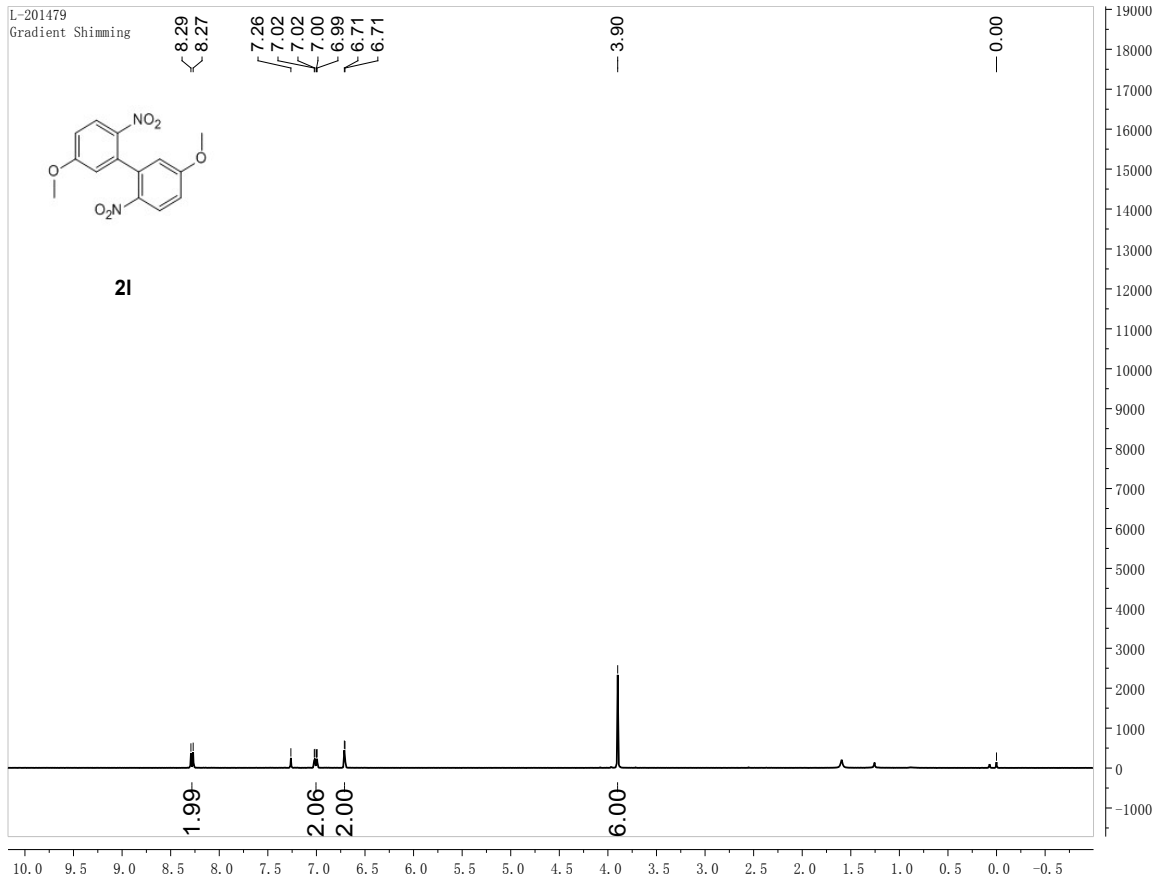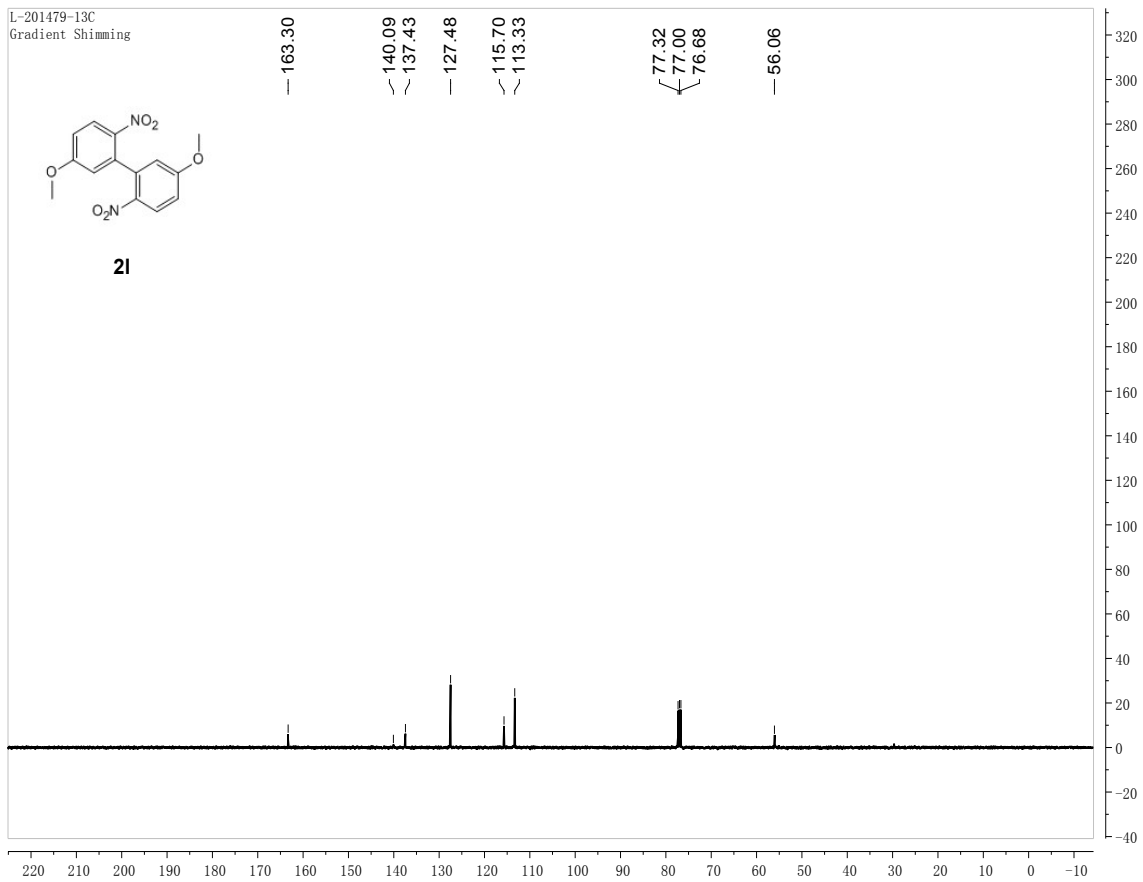

Supplement: c5ra07771k1.pdf [file c5ra07771k1.pdf]
